# Supplementary material for: Structure, defects and thermal stability of delithiated olivine phosphates
Source: Royal Society of Chemistry journal article supplement (doi:10.1039/c2jm33183g), 2012-01-01
Supplement: c2jm33183g.pdf [file c2jm33183g.pdf]

## Supplementary Material

### Structure, defects and thermal stability of delithiated olivine phosphates

Gene M. Nolis,<sup>a</sup> Fredrick Omenya,<sup>a</sup> Ruibo Zhang,<sup>a</sup> Bin Fang,<sup>a</sup> Shailesh Upreti,<sup>a</sup> Natasha A. Chernova,<sup>a</sup> Feng Wang,<sup>b</sup> Jason Graetz,<sup>b</sup> Yan-Yan Hu,<sup>c,d</sup> Clare P. Grey,<sup>c,d</sup> and M. Stanley Whittingham<sup>\*a,d</sup>

<sup>a</sup>Department of Chemistry and Materials Science and Engineering Program, Binghamton University, Binghamton, NY, 13902-6000, <sup>b</sup>Brookhaven National Laboratory, Upton, NY 11973, <sup>c</sup>Chemistry Department, University of Cambridge, Lensfield Rd, Cambridge, CB2 1EW, UK, <sup>d</sup>Chemistry Department, Stony Brook University, Stony Brook, New York 11794-3400, \*Corresponding author  
Email: stanwhit@gmail.com

### X-ray diffraction

The phase purity of both pristine  $\text{LiFe}_{1-y}\text{Mn}_y\text{PO}_4$  and  $\text{Fe}_{1-y}\text{Mn}_y\text{PO}_4$  products was first checked by powder x-ray diffraction (Figure S1). All samples were indexed with single-phase orthorhombic,  $Pnma$  space group, and have an olivine-type structure. Figure S1 summarizes unit cell dimensions for both olivine-type compounds obtained by Rietveld refinement. In addition, room-temperature synchrotron XRD patterns from the *in-situ* scans of delithiated olivine phosphate samples were refined; the resulting lattice parameters are also shown in figure S1 and do not show significant differences. Lattice parameters of *o*- $\text{LiFe}_{1-y}\text{Mn}_y\text{PO}_4$  match those reported in the literature and show characteristic isotropic expansion of orthorhombic lattice constants as a function of manganese content.<sup>1</sup> However, unlike their parent materials, *o*- $\text{Fe}_{1-y}\text{Mn}_y\text{PO}_4$  show anisotropic lattice expansion with manganese content; matching trends reported earlier by Yamada et al.<sup>1</sup> Rietveld refinement did not reveal additional electronic density at Li site, indicating that transition metals did not migrate to Li site upon delithiation; however, this technique is not very sensitive to residual, light-weight Li ions. Further characterization was pursued to determine Fe and Mn oxidation states correlating with possible residual Li.

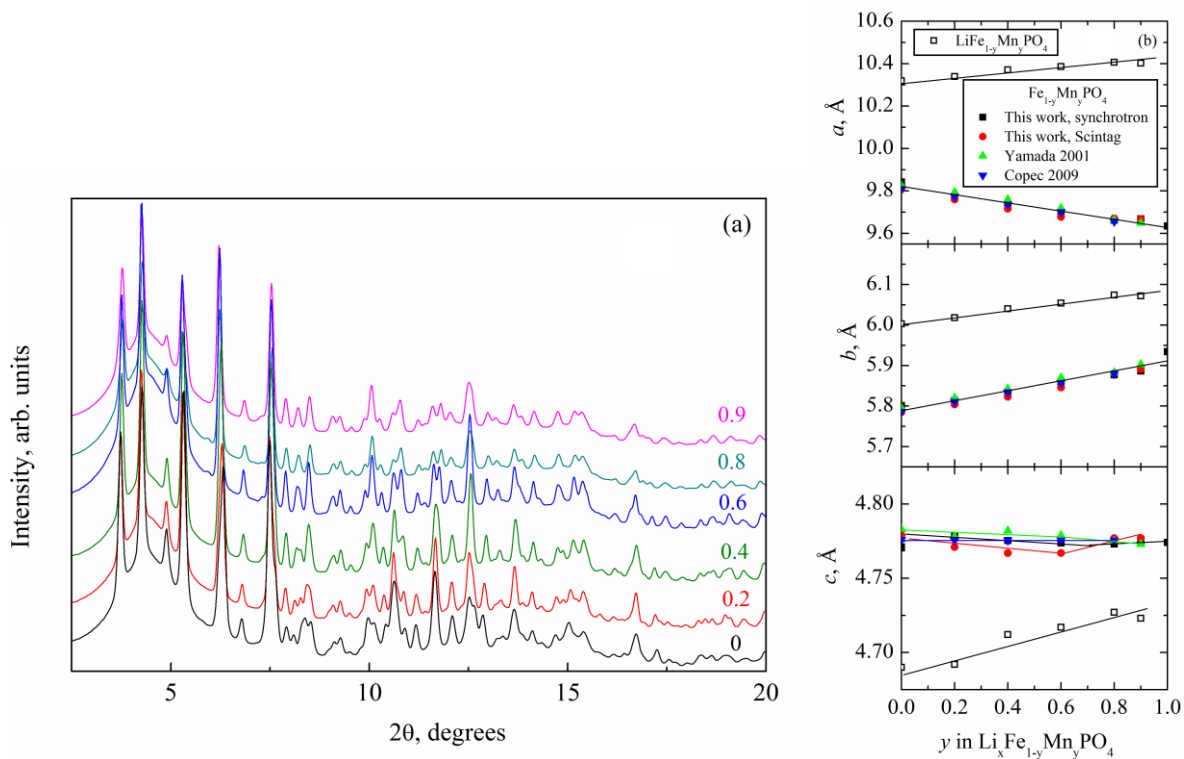

Figure S1. (a) Synchrotron X-ray diffraction patterns of  $\text{Fe}_{1-y}\text{Mn}_y\text{PO}_4$ , numbers indicate Mn content  $y$ . (b) Variation of the orthorhombic lattice parameters as a function of Mn,  $y$ , content in *o*- $\text{LiFe}_{1-y}\text{Mn}_y\text{PO}_4$  and *o*- $\text{Fe}_{1-y}\text{Mn}_y\text{PO}_4$ .

### X-ray absorption spectroscopy

XAS was utilized as a characterization method because it is sensitive to electronic and structural states of transition metals. Figures S2 and S3 indicate that the parent, lithiated species contained  $\text{Fe}^{2+}$  and  $\text{Mn}^{2+}$  in their correct oxidation states for all samples. Similarly,  $\text{Fe}^{3+}$  is in its correct oxidation state for all delithiated,  $o\text{-Fe}_{1-y}\text{Mn}_y\text{PO}_4$  samples. However, at high manganese concentrations in  $o\text{-Fe}_{1-y}\text{Mn}_y\text{PO}_4$ ,  $y = 0.8, 0.9$  and  $1$ , the absorption edge of  $\text{Mn}^{3+}$  signals at lower energy, suggesting incomplete delithiation with residual  $\text{Mn}^{2+}$ . NMR studies were carried out to further investigate this problem.

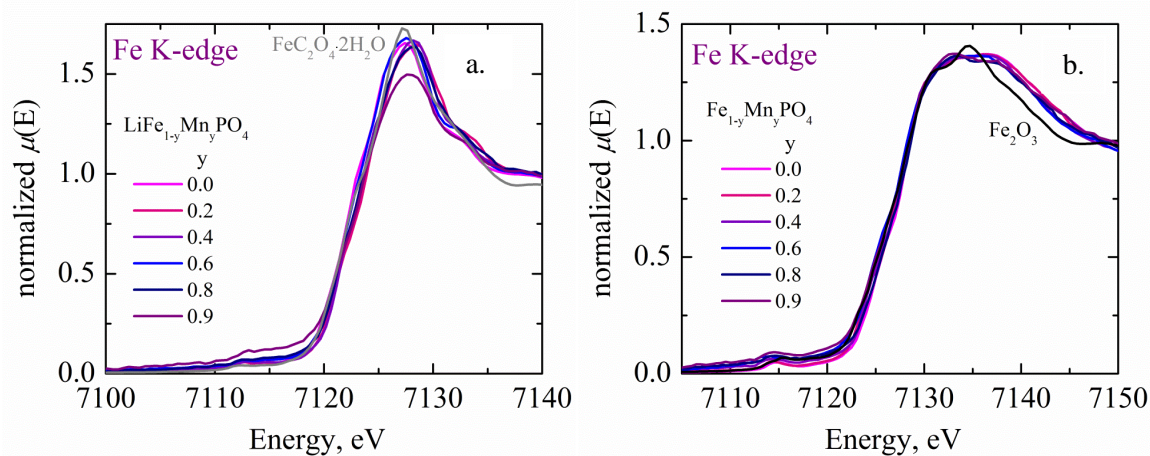

Figure S2. Fe K-edge x-ray absorption spectra for (a)  $o\text{-LiFe}_{1-y}\text{Mn}_y\text{PO}_4$  and (b)  $o\text{-Fe}^{3+}_{1-y}\text{Mn}_y\text{PO}_4$ .

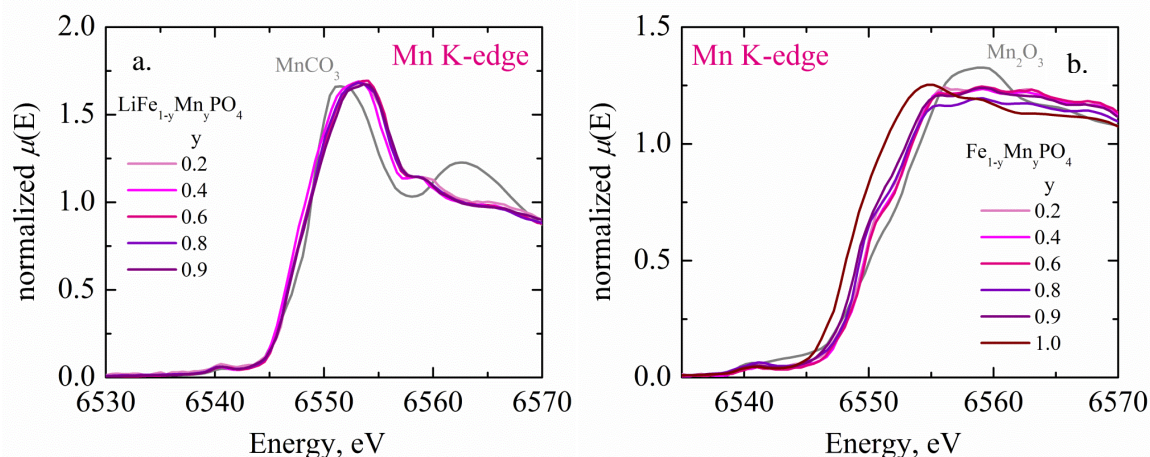

Figure S3. Mn K-edge x-ray absorption spectra for (a)  $o\text{-LiFe}_{1-y}\text{Mn}_y\text{PO}_4$  and (b)  $o\text{-Fe}^{3+}_{1-y}\text{Mn}_y\text{PO}_4$ .

### <sup>7</sup>Li solid-state nuclear magnetic resonance (NMR)

<sup>7</sup>Li solid state NMR is particularly useful to detect the existence of any residual Li and study its local environment. The <sup>7</sup>Li solid state NMR of delithiated olivine metal phosphates does not show significant <sup>7</sup>Li signals up to Mn concentrations of  $y = 0.4$ . At higher Mn concentrations, however, quantitative analysis shows that *o*-Fe<sub>0.6</sub>Mn<sub>0.4</sub>PO<sub>4</sub>, *o*-Fe<sub>0.4</sub>Mn<sub>0.6</sub>PO<sub>4</sub>, *o*-Fe<sub>0.2</sub>Mn<sub>0.8</sub>PO<sub>4</sub> and *o*-Fe<sub>0.1</sub>Mn<sub>0.9</sub>PO<sub>4</sub> contain some residual Li; results are summarized in Table S1. According to Figure S4, the residual <sup>7</sup>Li NMR signal resonates close to the chemical shift of <sup>7</sup>Li in *o*-LiMnPO<sub>4</sub>, but gradually shifts to a lower field as Fe content increases, which is due to the increased degree of delithiation leading to higher oxidation states of the Fe/Mn ions. The <sup>7</sup>Li signal from the delithiation product of the pure *o*-LiMnPO<sub>4</sub> resembles that of the pristine *o*-LiMnPO<sub>4</sub>. However, the residual <sup>7</sup>Li peaks of *o*-Fe<sub>0.6</sub>Mn<sub>0.4</sub>PO<sub>4</sub>, *o*-Fe<sub>0.4</sub>Mn<sub>0.6</sub>PO<sub>4</sub>, *o*-Fe<sub>0.2</sub>Mn<sub>0.8</sub>PO<sub>4</sub> and *o*-Fe<sub>0.1</sub>Mn<sub>0.9</sub>PO<sub>4</sub> also show significant broadening compared to that of (Li)MnPO<sub>4</sub>, likely induced by the presence of Fe<sup>2+</sup>. Therefore, the residual Li in these samples is in a Mn-rich, but Fe-containing environment.

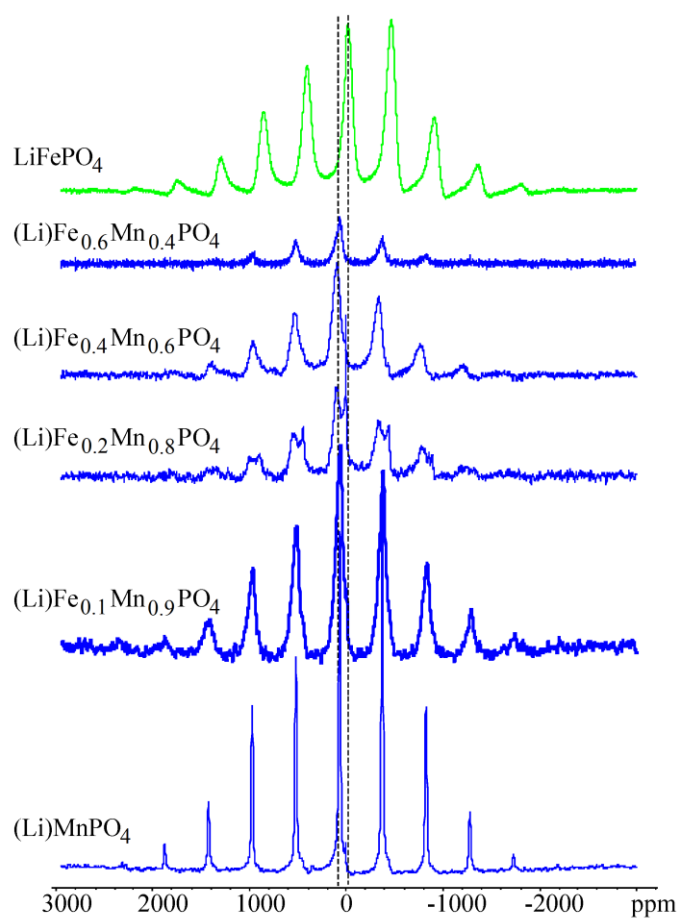

Figure S4. <sup>7</sup>Li NMR spectra for pristine *o*-LiFePO<sub>4</sub> and *o*-Li<sub>x</sub>Fe<sub>1-y</sub>Mn<sub>y</sub>PO<sub>4</sub>. The spectrum intensity of *o*-LiFePO<sub>4</sub> is scaled by 1/40.

Table S1.  $o$ -Fe<sub>1-y</sub>Mn<sub>y</sub>PO<sub>4</sub> sample compositions from <sup>7</sup>Li NMR and CH analysis.

| y   | H, wt.%<br>try 1 | H, wt.%<br>try 2 | C, wt.%<br>try 1 | C, wt.%<br>try 2 | Residual Li,<br>(wt.%) | Average Sample<br>Composition*                                                                              |
|-----|------------------|------------------|------------------|------------------|------------------------|-------------------------------------------------------------------------------------------------------------|
| 0   | 0.0013           | 0.0024           | 0.0216           | 0.023            | 0.0167                 | H <sub>0.28</sub> Li <sub>0.004</sub> FePO <sub>4</sub> C <sub>0.28</sub>                                   |
| 0.4 |                  |                  |                  |                  | 0.045                  | Li <sub>0.01</sub> Fe <sub>0.6</sub> Mn <sub>0.4</sub> PO <sub>4</sub>                                      |
| 0.6 |                  |                  |                  |                  | 0.0766                 | Li <sub>0.016</sub> Fe <sub>0.4</sub> Mn <sub>0.6</sub> PO <sub>4</sub>                                     |
| 0.8 | 0.0018           | 0.0025           | 0.048            | 0.0466           | 0.0704                 | H <sub>0.32</sub> Li <sub>0.015</sub> Fe <sub>0.2</sub> Mn <sub>0.8</sub> PO <sub>4</sub> C <sub>0.59</sub> |
| 0.9 | 0.0014           | 0.0026           | 0.0614           | 0.0599           | 0.121                  | H <sub>0.30</sub> Li <sub>0.026</sub> Fe <sub>0.1</sub> Mn <sub>0.9</sub> PO <sub>4</sub> C <sub>0.76</sub> |
| 1.0 |                  |                  |                  |                  | 0.123                  | Li <sub>0.027</sub> MnPO <sub>4</sub>                                                                       |

\* The composition reflects molar ratios of the elements in the samples; it does not imply that such compound is actually formed.

### Scanning transmission electron microscopy (STEM) with electron energy loss spectroscopy (EELS)

In addition to <sup>7</sup>Li NMR, STEM-EELS were used to make local chemical analysis of the delithiated olivine phosphates, with high sensitivity to the location and chemical state of residual Li.<sup>2</sup> According to Figs. 2 and S5, particle size for these samples is approximately 100 ± 50 nm. STEM-EELS analysis in Fig. S5 indicates complete Li removal from  $o$ -LiFePO<sub>4</sub>, confirming <sup>7</sup>Li NMR results. However, STEM-EELS indicates small amount of Li remaining after delithiation  $o$ -LiFe<sub>0.1</sub>Mn<sub>0.9</sub>PO<sub>4</sub>, as evidenced by the presence of the Li K-edge peak. Furthermore, TEM results indicate good crystallinity for samples, consistent with PXRD patterns.

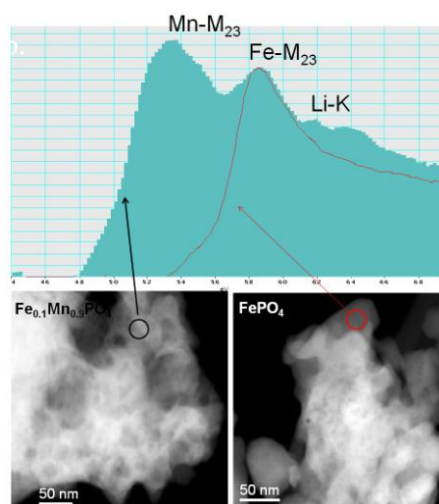

Figure S5. Chemical analysis of  $o$ -FePO<sub>4</sub> and  $o$ -Fe<sub>0.1</sub>Mn<sub>0.9</sub>PO<sub>4</sub> by STEM-EELS. The regions to acquire the EELS spectra (top) were indicated by circles with different colors in the annual dark-field images (bottom).

### In-situ high-temperature X-ray diffraction.

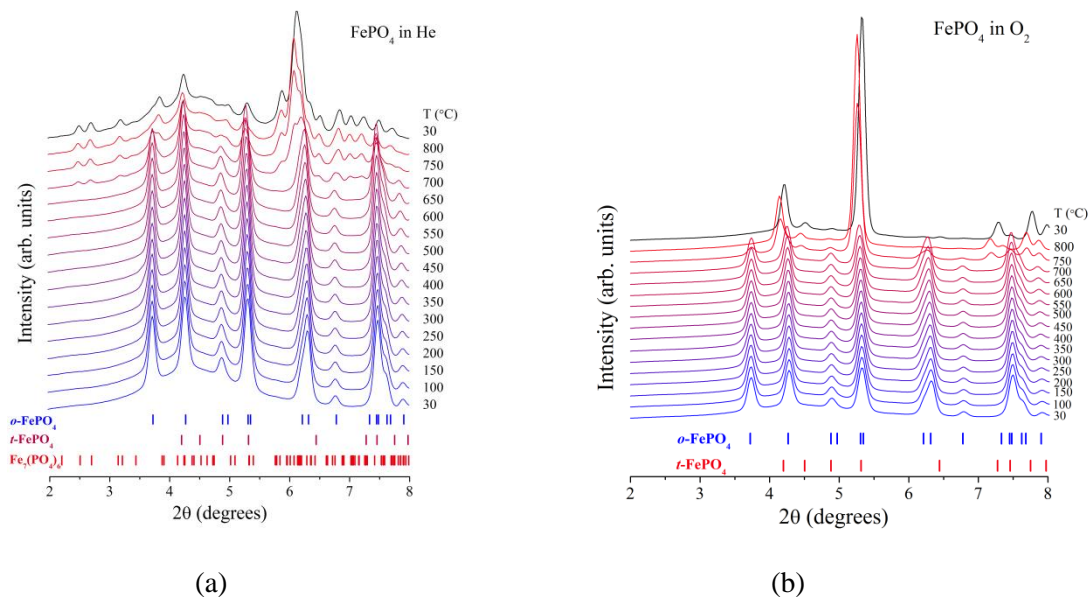

Figure S6. *In-situ* XRD data while heating  $o\text{-FePO}_4$  to 800 °C under (a) helium and (b) oxygen.

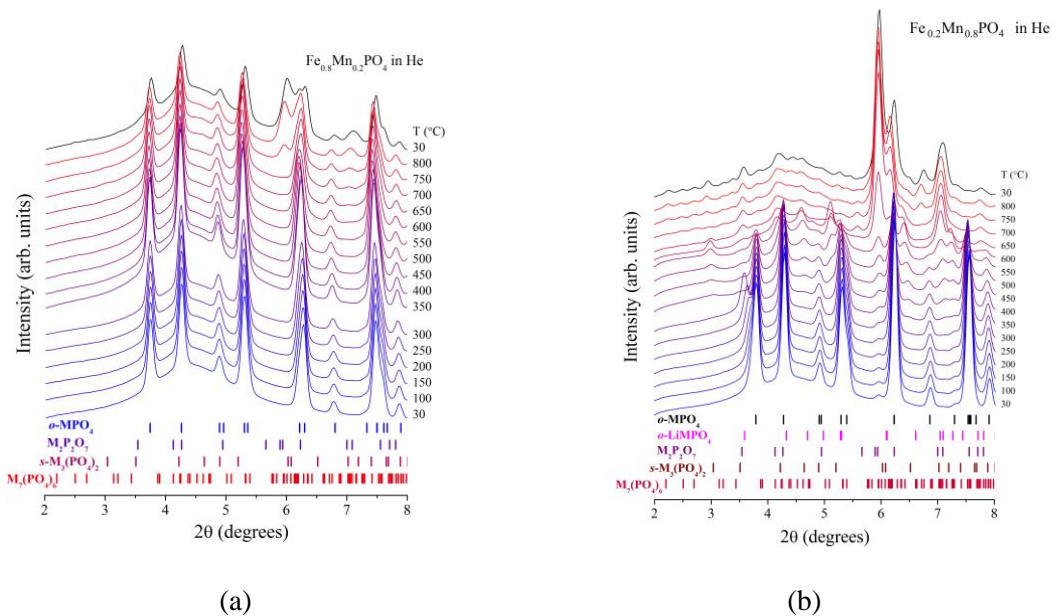

Figure S7. *In-situ* XRD data while heating  $o\text{-Fe}_{1-y}\text{Mn}_y\text{PO}_4$  to 800 °C under helium. (a)  $y = 0.2$ , (b)  $y = 0.8$ .

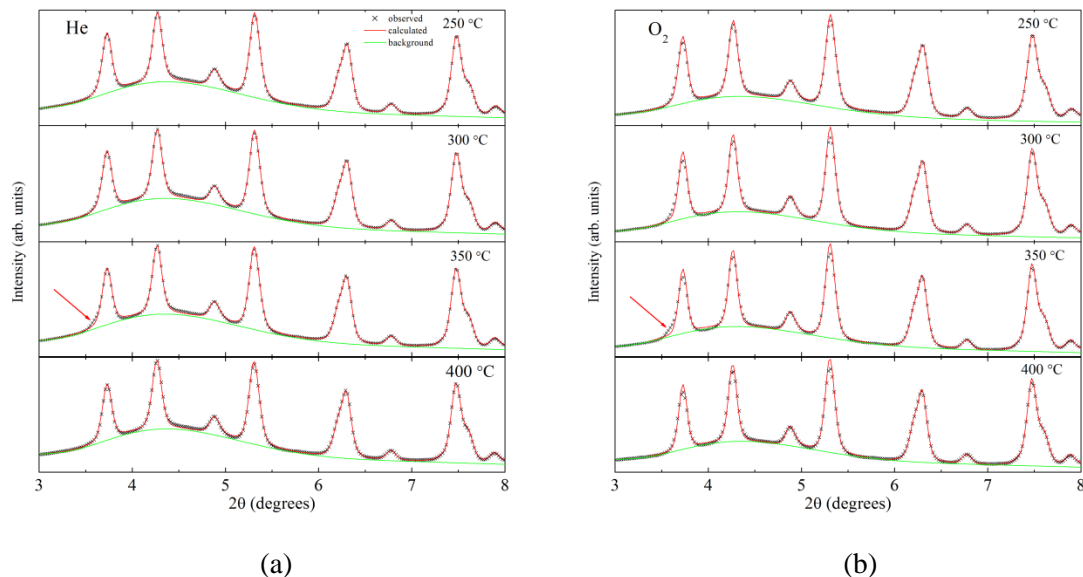

Figure S8. *In-situ* XRD data refinements while heating *o*-FePO<sub>4</sub> between 250 and 400 °C under (a) helium and (b) oxygen.

#### Thermogravimetric Analysis, Differential Scanning Calorimetry and Mass Spectrometry

According to Fig. S9, two notable thermal events occurred at 500 °C and 530 °C; when *o*-Fe<sub>0.8</sub>Mn<sub>0.2</sub>PO<sub>4</sub> was heated to 725 °C under inert atmospheric conditions during calorimetry testing. The first thermal event, occurring with a peak maximum at 500 °C, is accompanied by a 4 % weight loss and is associated with an exothermic transition enthalpy of 165.3 J g<sup>-1</sup>. In addition, a second exothermic phase transition, with a peak maximum at approximately 600 °C, accounts for 155.8 J g<sup>-1</sup> of heat evolved.

Furthermore, Fig. S9 shows a large exothermic transition, releasing 350 J g<sup>-1</sup> of heat, occurs at 535 °C for Fe<sub>0.6</sub>Mn<sub>0.4</sub>PO<sub>4</sub>. Mass-spectroscopy analysis of the heating process indicates H<sub>2</sub>O evolution above 300 °C, suggesting the delithiated olivine phosphate systems are hydrophilic by nature, consistent with previous reports.<sup>3</sup> The source of residual carbon in *o*-Fe<sub>0.6</sub>Mn<sub>0.4</sub>PO<sub>4</sub>, and ultimately CO<sub>2</sub>, likely originates from the carbon-containing precursors. *In-situ* x-ray analysis of this sample indicates a major phase transformation occurring above 650 °C; due to the slow kinetics of solid systems, this phase change is associated with the exothermic event at 535 °C, seen in DSC results. Phase refinement of the end product, after heating to 800 °C, during *in-situ* analysis indicates a major product formation of (Fe,Mn)<sub>2</sub>P<sub>2</sub>O<sub>7</sub>, consistent with theoretical predictions and observed oxygen evolution above 700 °. In addition, a minor mixed-valent phosphate phase, (Fe,Mn)<sub>7</sub>(PO<sub>4</sub>)<sub>6</sub>, formed at temperatures above 700 °C.

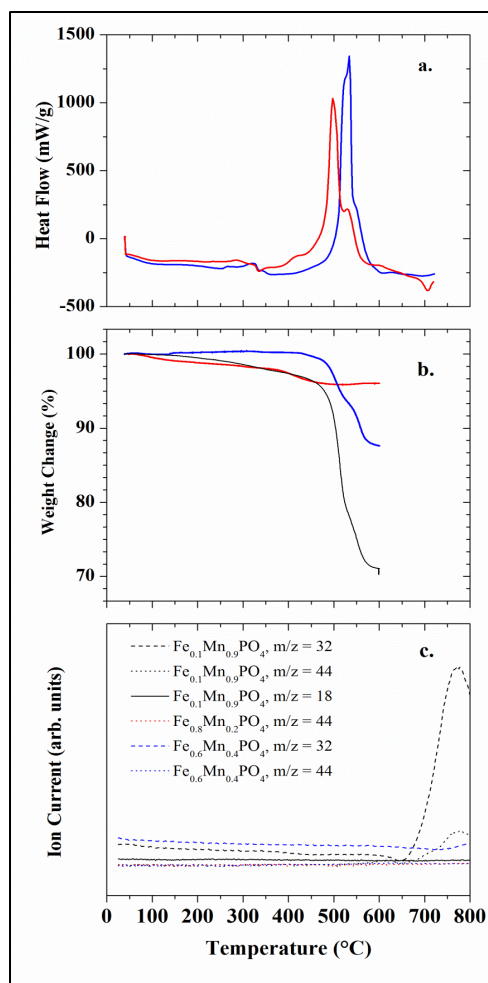

Figure S9. (a) DSC, (b) TGA and (c) MS curves showing thermal events while heating *o*-Fe<sub>0.8</sub>Mn<sub>0.2</sub>PO<sub>4</sub> (red lines), *o*-Fe<sub>0.6</sub>Mn<sub>0.4</sub>PO<sub>4</sub> (blue lines) and *o*-Fe<sub>0.1</sub>Mn<sub>0.9</sub>PO<sub>4</sub> (black lines) in inert atmospheric conditions. The shift in the temperature between DSC, TGA and MS data is caused by the fact that the MS data was taken during in-situ XRD scans and it takes extra time for the gas to get to the gas analyzer in this experimental setup.



### SEM of nano-LiFe<sub>0.25</sub>Mn<sub>0.75</sub>PO<sub>4</sub>

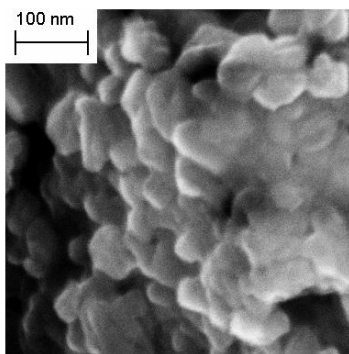

Figure S10. SEM image of nano-LiFe<sub>1-y</sub>Mn<sub>y</sub>PO<sub>4</sub> ( $0.7 < y < 0.75$ ).

#### References

1. A. Yamada, S.-C. Chung, *J. Electrochem. Soc.*, 2001, **148**, A960.
2. F. Wang, J. Graetz, M. Moreno, C. Ma, L. Wu, V. Volkov, and Y. Zhu, *ACS Nano*, 2011, **5**, 1190.
3. G. Chen, A. Shukla, X. Song and T. Richardson, *J. Mater. Chem.*, 2011, **21**, 10126.
